# Supplementary material for: Effects of Multiple Karenia brevis Red Tide Blooms on a Common Bottlenose Dolphin (Tursiops truncatus) Prey Fish Assemblage: Patterns of Resistance and Resilience in Sarasota Bay, Florida
Source: Frontiers journal article supplement (doi:10.3389/fmars.2021.711114), 2021-08-12
Supplement: Data_Sheet_1.docx [file Data_Sheet_1.docx]

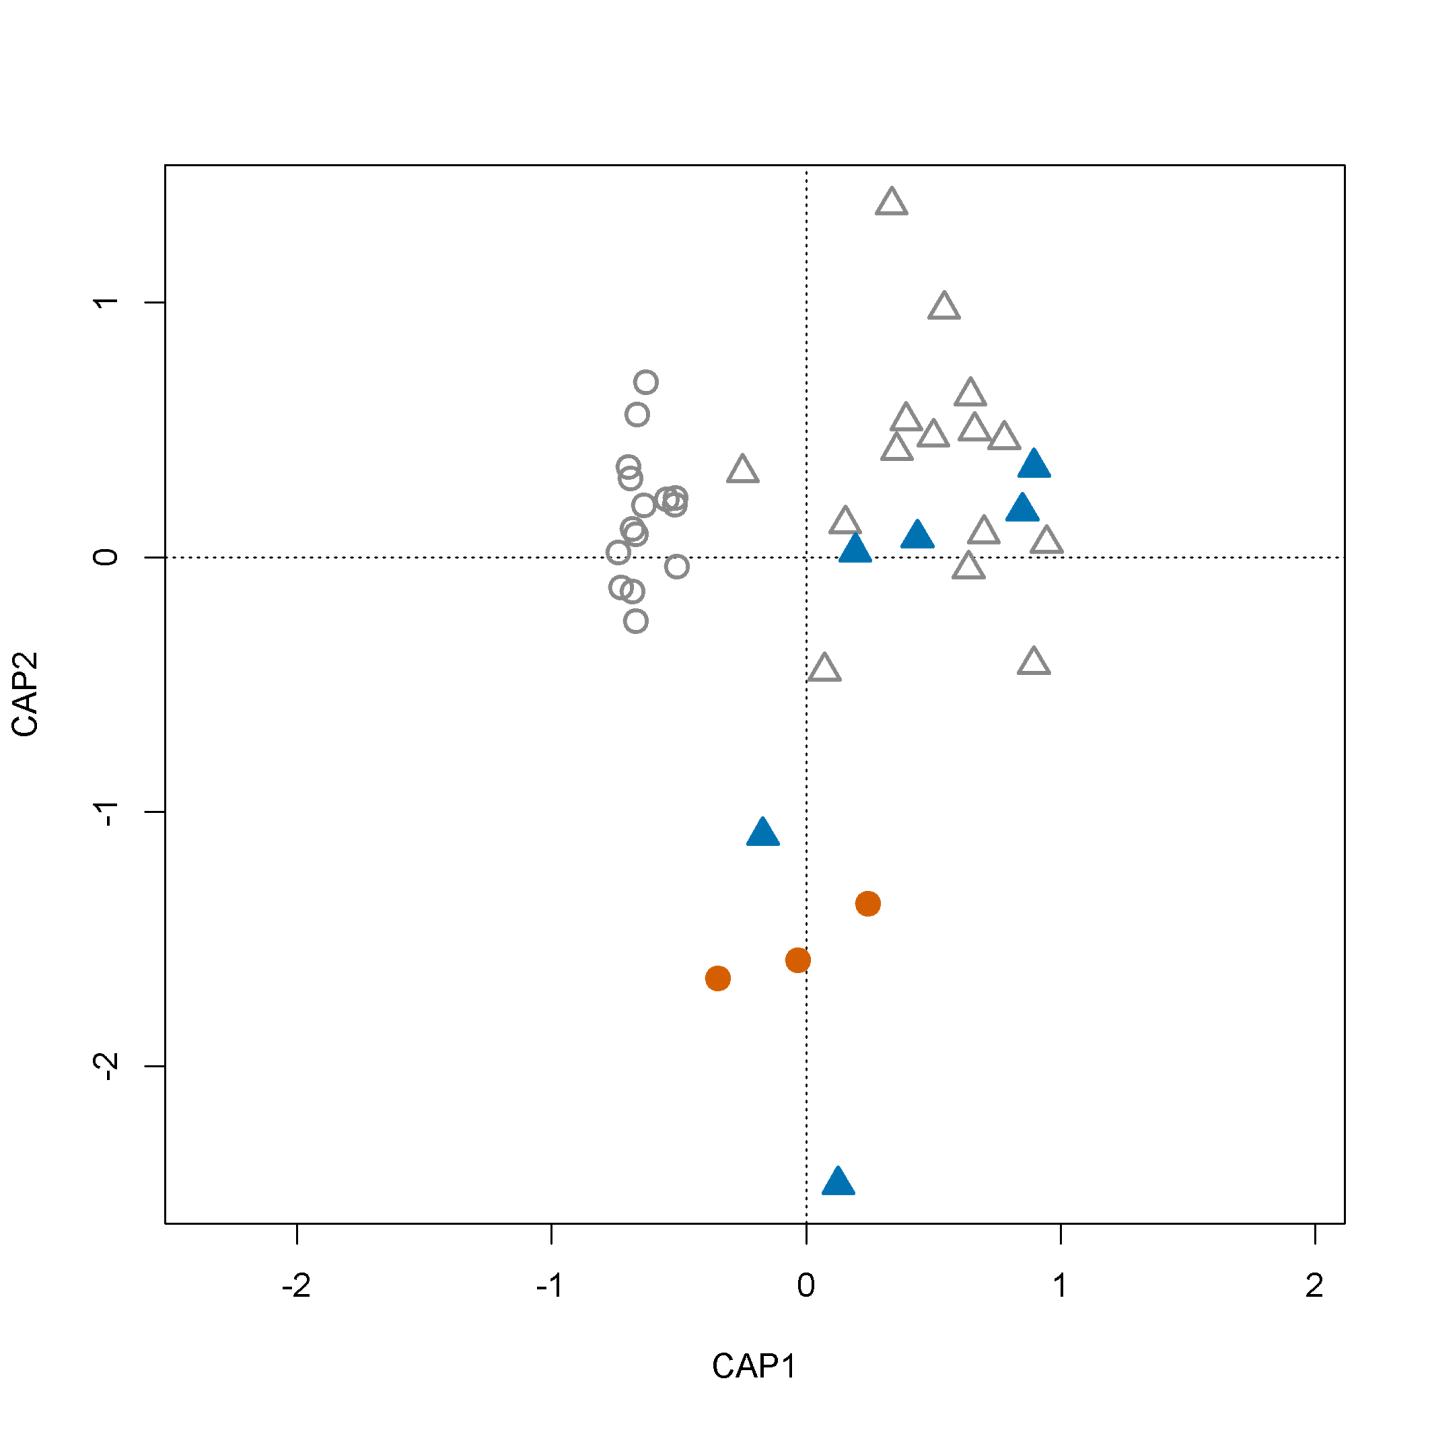


Figure S1. Canonical analysis of principal coordinates analysis (CAP) of prey assemblage structure based on year, season, and bloom condition during red tide events during 2004-2019 in Sarasota Bay, Florida. Symbols: ● = summer red tide conditions, (Aug.-Sept.); ○ = summer non-red tide conditions, (Jun.-Jul.); ▲= winter red tide conditions, (Oct.-Dec.); Δ = winter non-red tide conditions, (Jan.-Mar.)
