# Supplementary material for: Effects of Multiple Karenia brevis Red Tide Blooms on a Common Bottlenose Dolphin (Tursiops truncatus) Prey Fish Assemblage: Patterns of Resistance and Resilience in Sarasota Bay, Florida
Source: Frontiers journal article supplement (doi:10.3389/fmars.2021.711114), 2021-08-12
Supplement: Data_Sheet_2.docx [file Data_Sheet_2.docx]

**(A)**


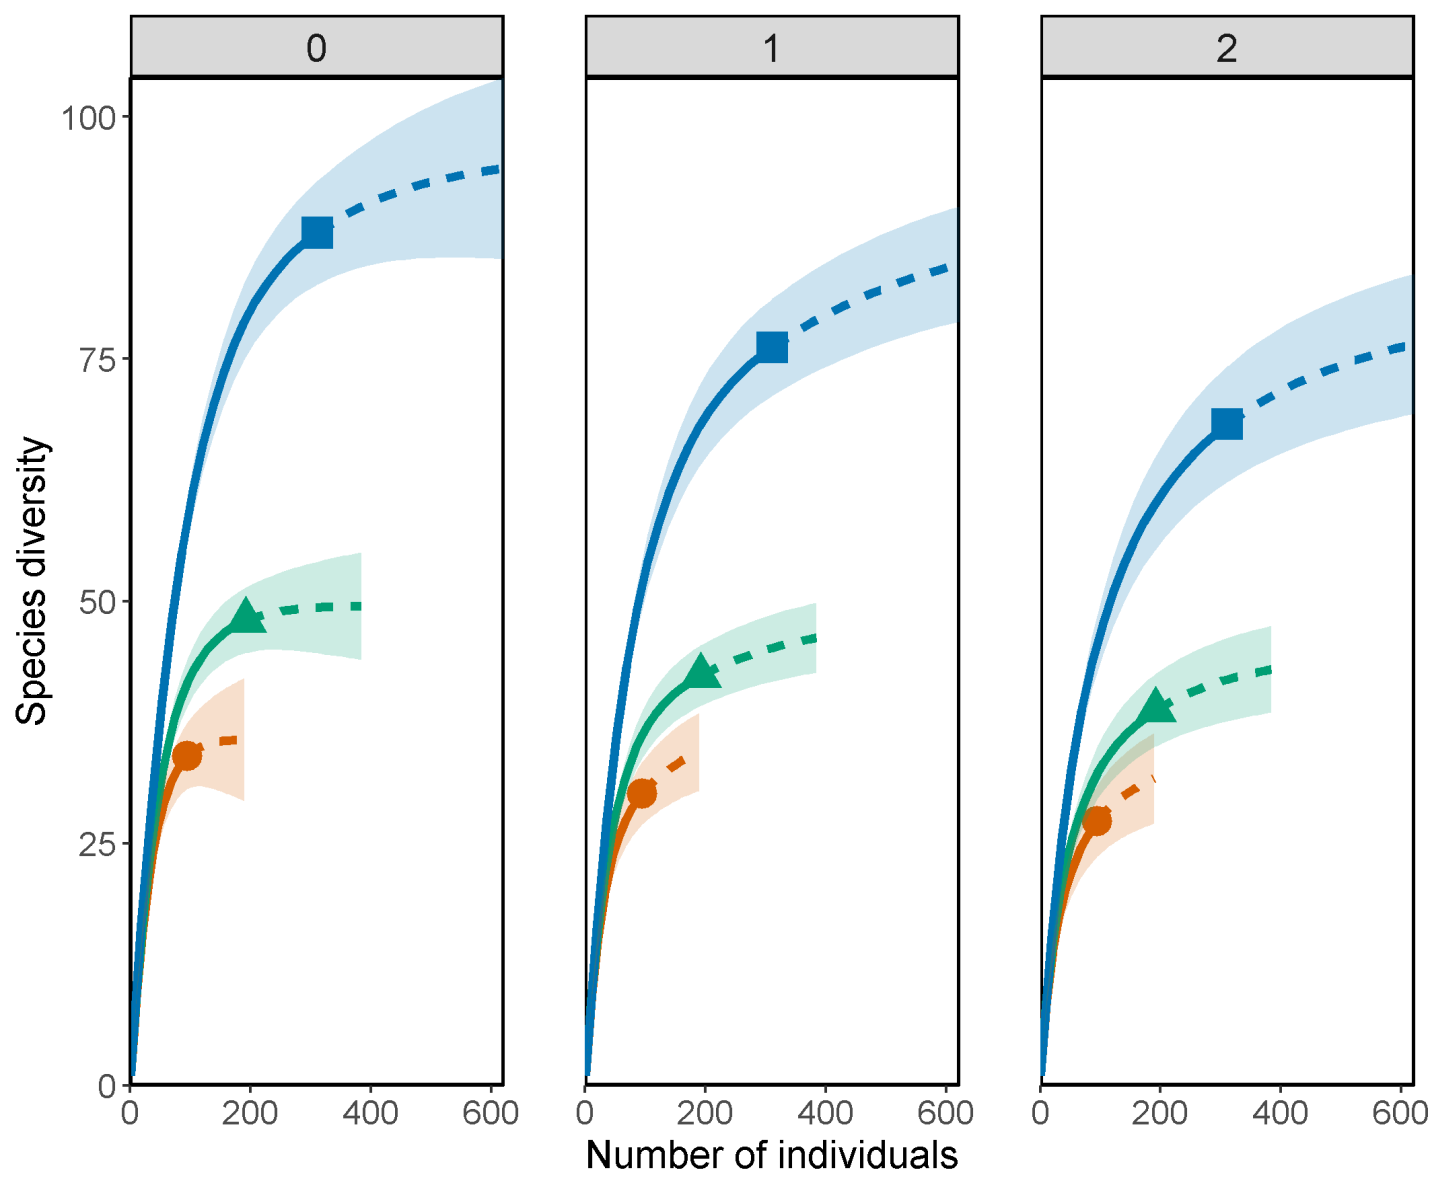


2005

2006

2018

**(B)**


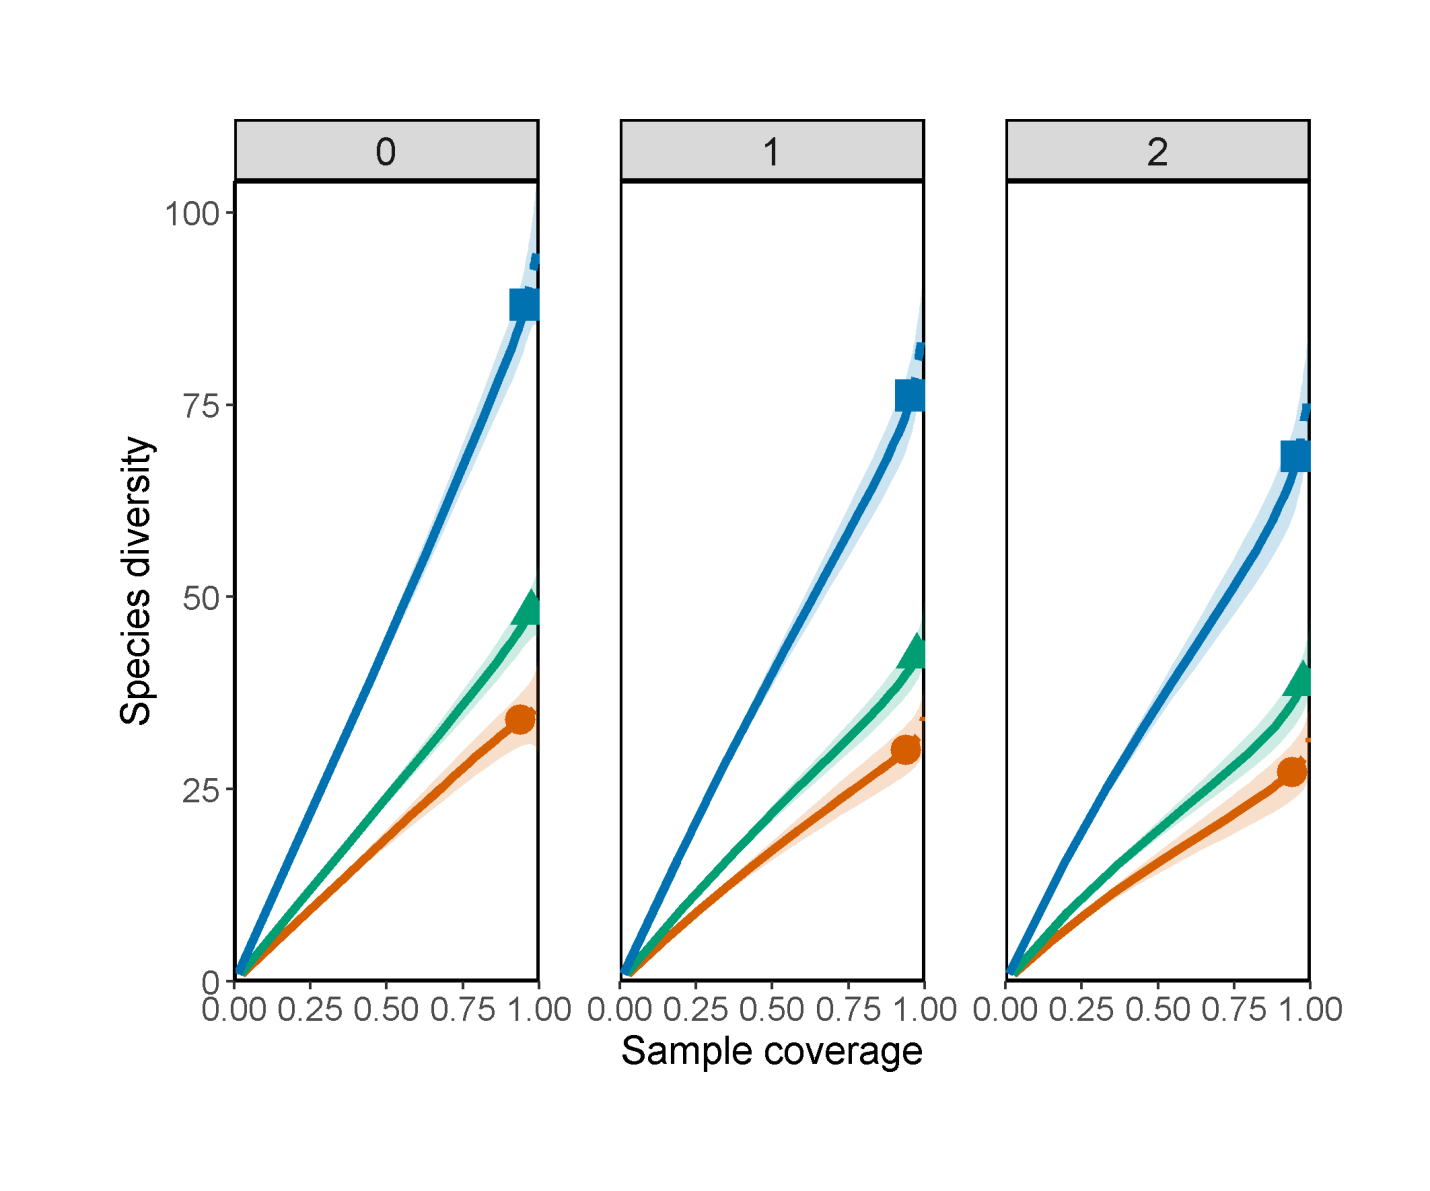


2005

2006

2018

**(C)**


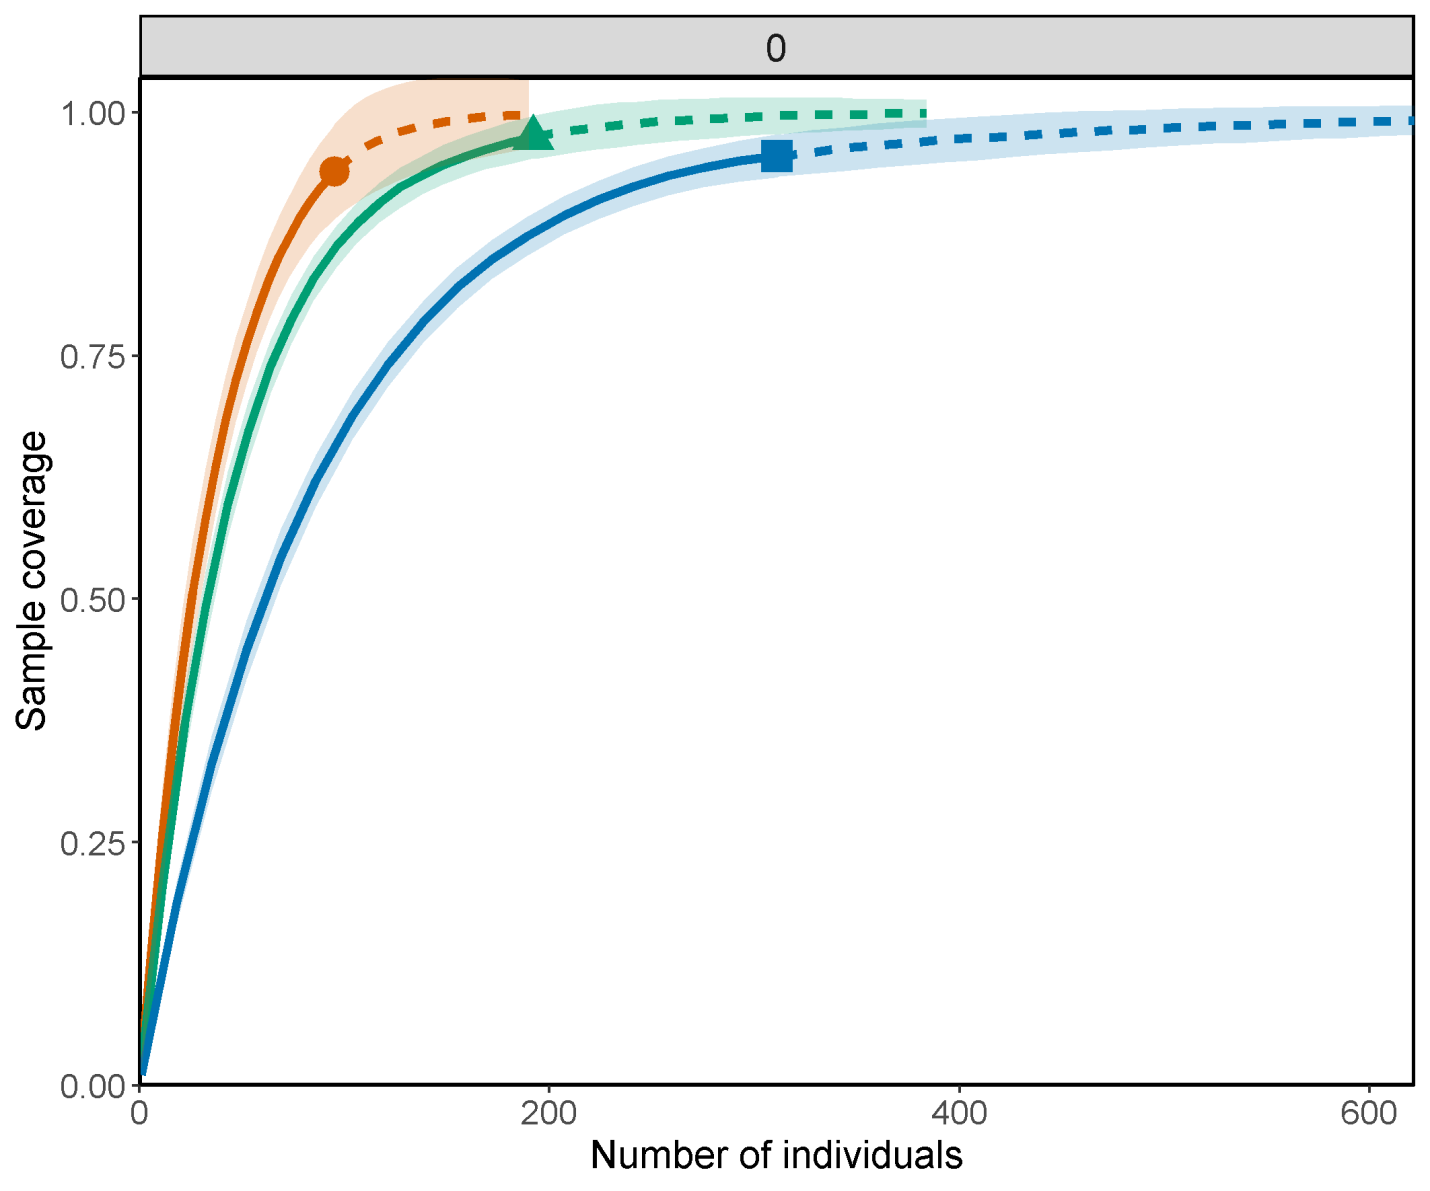


2005

2006

2018

Figure S2. Species richness and diversity during years with summer red tide events using (A) sample-size-based and (B) coverage-based rarefaction (solid lines) and extrapolation (dashed lines) sampling curves with 95% confidence intervals (shaded areas, based on a bootstrap method with 1,000 replications) for each diversity order: *q*= 0 (species richness, left panel), *q*= 1 (Shannon diversity, middle panel) and *q*= 2 (Simpson diversity, right panel). The solid symbols represent the reference samples. (C) Sample completeness curves linking curves in (Figure S1A) and (Figure S1B).
